# Supplementary material
Source: PubMed Central journal article supplement (PMC4791616)
Supplement: aasm.39.4.825s1.pdf [file aasm.39.4.825s1.pdf]

**Table S1.** Baseline sample characteristics stratified by alcohol and OTC medication use.

|                                    | OTC Medication          |                             | $\chi^2$      | Alcohol                |                             | $\chi^2$      |
|------------------------------------|-------------------------|-----------------------------|---------------|------------------------|-----------------------------|---------------|
|                                    | Users<br>(n = 172)<br>% | Non-users<br>(n = 477)<br>% |               | Users<br>(n = 81)<br>% | Non-users<br>(n = 568)<br>% |               |
| Gender, female                     | 26.5                    | 73.5                        |               | 12.5                   | 87.5                        |               |
| Race:                              | 77.3                    | 66.5                        | 7.0; p < .01† | 54.3                   | 71.5                        | 9.8; p < .01‡ |
| White                              |                         |                             | 3.0; p = .08  |                        |                             | 2.4; p = .12  |
| African American                   | 77.3                    | 66.9                        |               | 63.0                   | 69.9                        |               |
| Asian                              | 75.0                    | 26.4                        |               | 32.1                   | 23.8                        |               |
| Other                              | 20.0                    | 1.0                         |               | 0.0                    | 1.2                         |               |
| Married                            | 1.2                     | 5.7                         |               | 4.9                    | 5.1                         |               |
| Risk for Sleep Apnea               | 61.6                    | 61.6                        | 0.0; p = .99  | 59.3                   | 62.0                        | 0.2; p = .64  |
| Risk for RLS                       | 26.2                    | 32.1                        | 2.1; p = .15  | 31.5                   | 23.5                        | 2.2; p = .14  |
|                                    | 8.7                     | 6.1                         | 1.4; p = .24  | 7.0                    | 4.9                         | 0.5; p = .48  |
|                                    | Mean (SD)               | Mean (SD)                   | F-test        | Mean (SD)              | Mean (SD)                   | F-test        |
| Age                                | 48.1 (12.4)             | 48.1 (11.3)                 | 0.0; p = .92  | 47.8 (11.2)            | 48.2 (11.7)                 | 0.1; p = .72  |
| Body Mass Index, kg/m <sup>2</sup> | 28.7 (6.1)              | 30.0 (7.2)                  | 1.9; p = .17  | 28.6 (5.2)             | 29.7 (7.1)                  | 0.5; p = .50  |
| Insomnia Severity Index            | 11.4 (3.6)              | 10.7 (4.0)                  | 3.9; p = .05  | 10.7 (3.8)             | 10.9 (3.9)                  | 0.0; p = .84  |
| Sleep parameters (minutes):        |                         |                             |               |                        |                             |               |
| SOL                                | 62.7 (45.2)             | 58.2 (49.5)                 | 0.9; p = .35  | 57.5 (51.9)            | 59.7 (47.9)                 | 0.0; p = .96  |
| WASO                               | 95.7 (78.6)             | 83.3 (68.6)                 | 4.0; p = .05  | 78.8 (76.1)            | 87.7 (70.9)                 | 0.5; p = .47  |
| TST                                | 339.9 (76.3)            | 333.0 (80.6)                | 0.7; p = .41  | 328.7 (65.6)           | 335.7 (81.3)                | 0.2; p = .63  |
| Epworth Sleepiness Scale           | 8.23 (4.1)              | 8.8 (4.7)                   | 1.2; p = .28  | 9.0 (4.8)              | 8.6 (4.5)                   | 0.6; p = .43  |
| Beck Anxiety Inventory             | 11.1 (8.4)              | 10.1 (8.4)                  | 1.7; p = .20  | 11.2 (8.1)             | 11.2 (8.1)                  | 1.6; p = .21  |
| QIDS                               | 8.9 (4.2)               | 8.1 (4.1)                   | 2.6; p = .08  | 8.7 (4.1)              | 8.7 (4.1)                   | 0.8; p = .38  |

†, *Cramer's V* = .10; ‡, *Cramer's V* = .12; OTC, over-the-counter medication; RLS, restless leg syndrome; SOL, sleep onset latency; WASO, wake time after sleep onset; TST, total sleep time; QIDS, Quick Inventory of Depressive Symptomatology
